# Supplementary material for: The Screening and Isolation of Ethyl-Carbamate-Degrading Strains from Fermented Grains and Their Application in the Degradation of Ethyl Carbamate in Chinese Baijiu
Source: MDPI journal article supplement (doi:10.3390/foods12152843), 2023-07-27
Supplement: s1 [file s1]

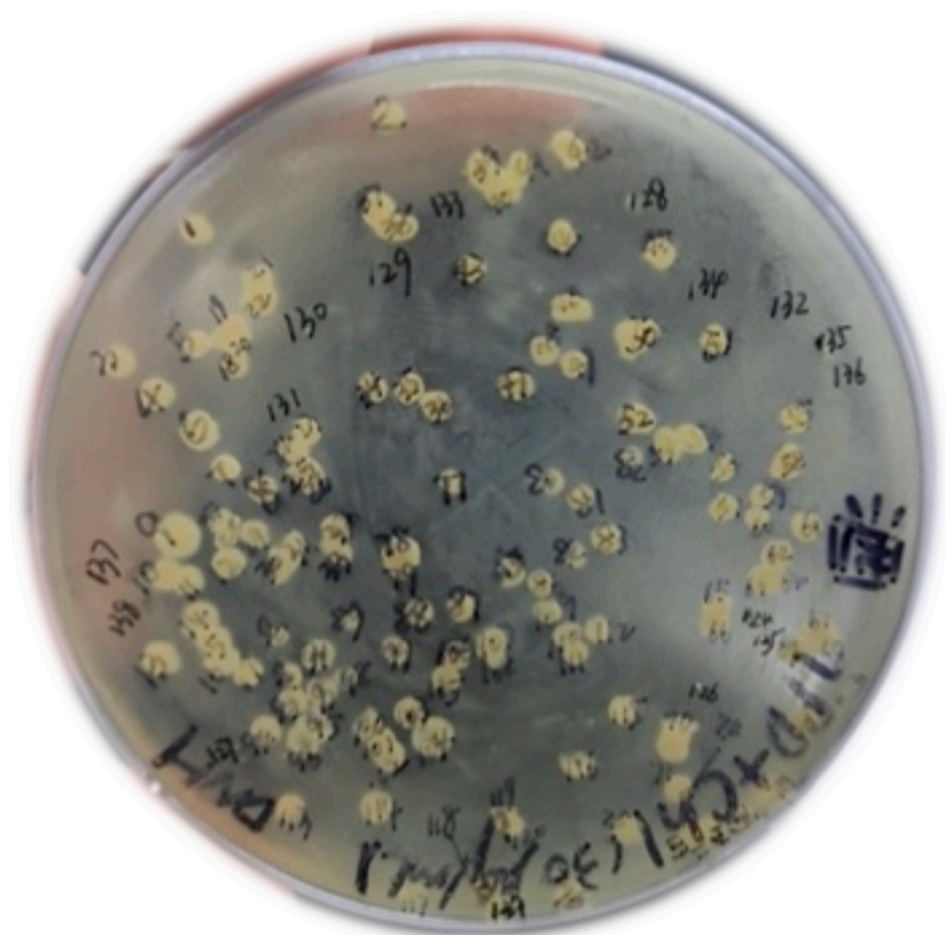

**Figure S1** The strains can grow using EC as the sole carbon source.

| Microscopy                                                                                        | Colony morphology                                                                   | Microscopy                                                                                          |
|---------------------------------------------------------------------------------------------------|-------------------------------------------------------------------------------------|-----------------------------------------------------------------------------------------------------|
| <b>J1</b><br>    |    | <b>J2</b><br>    |
| <b>J3</b><br>    |    | <b>J4</b><br>    |
| <b>J5</b><br>   |   | <b>J6</b><br>   |
| <b>J9</b><br>  |  | <b>J10</b><br> |
| <b>J11</b><br> |  | <b>J12</b><br> |



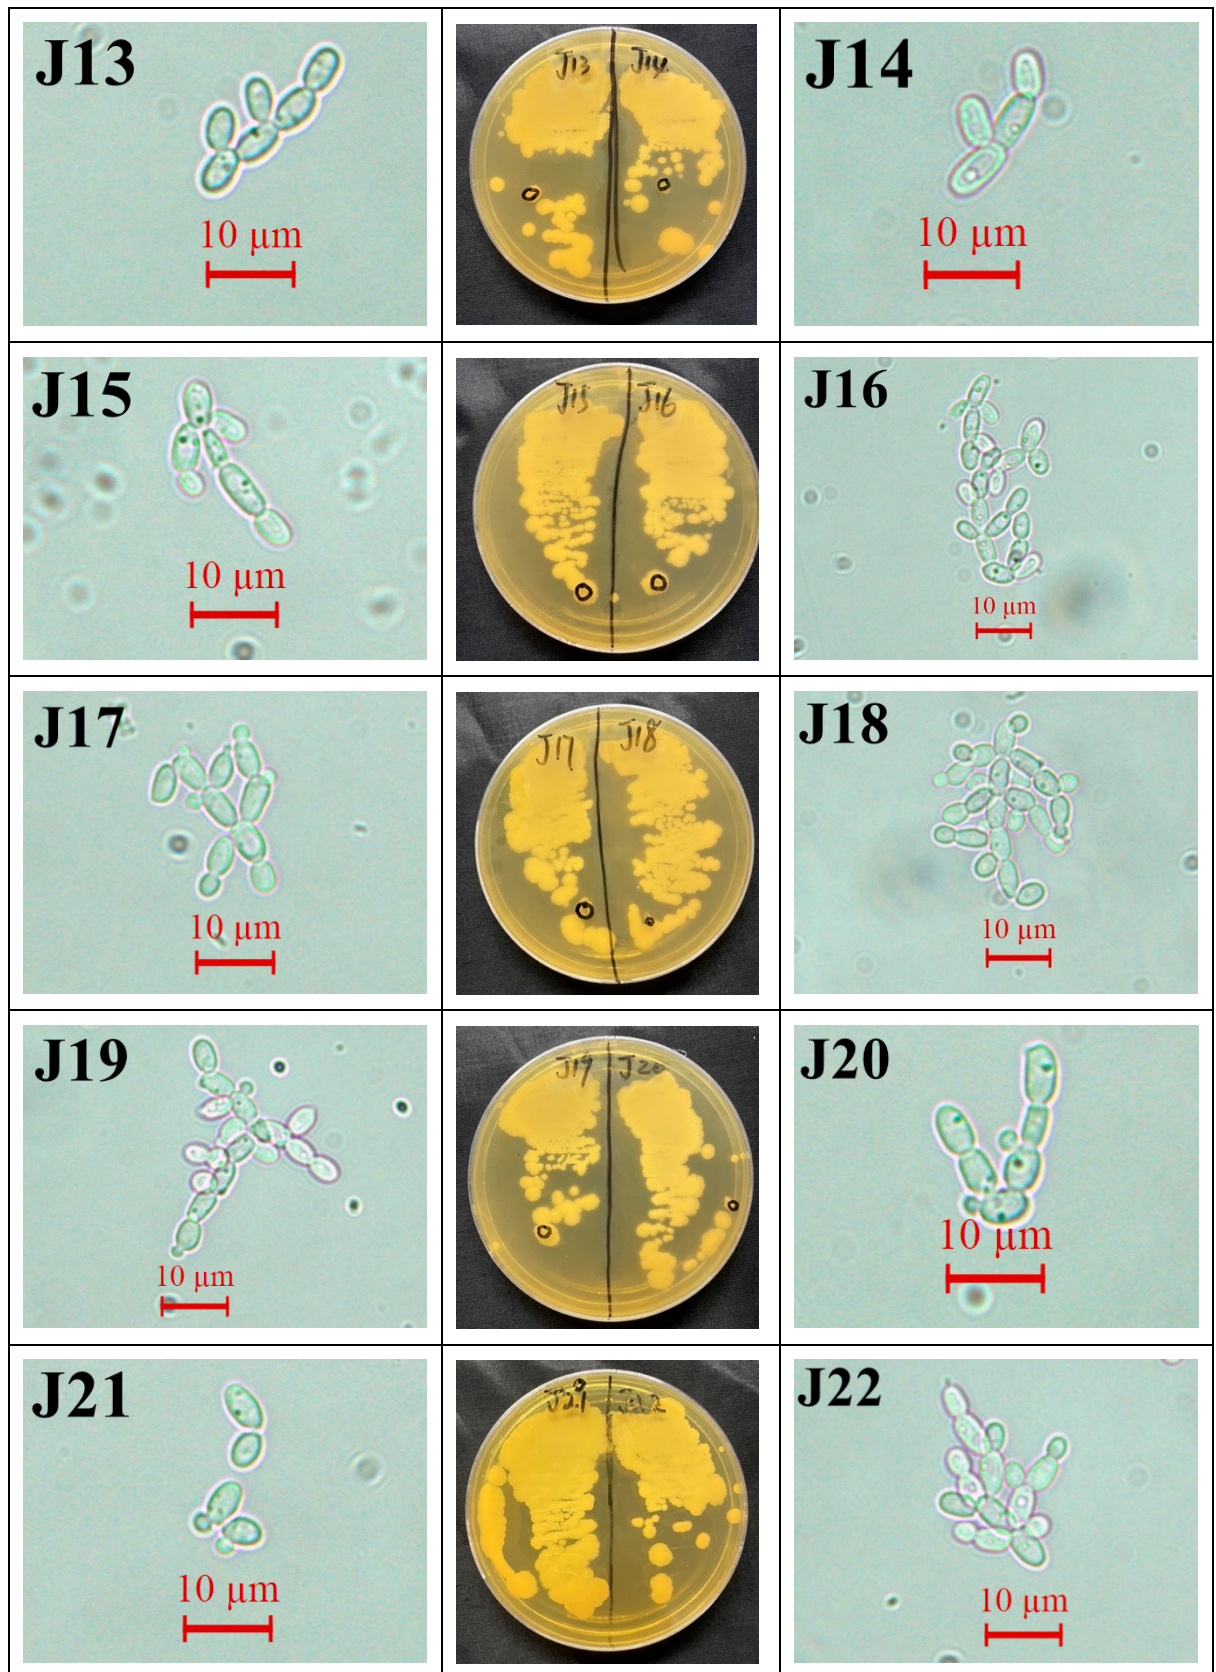



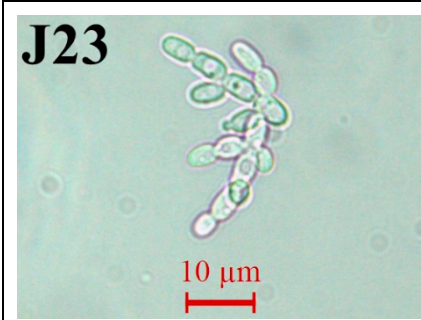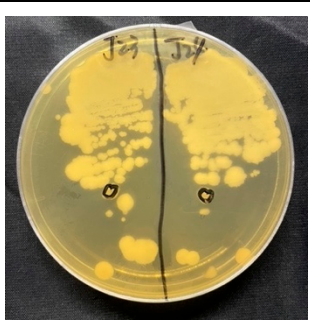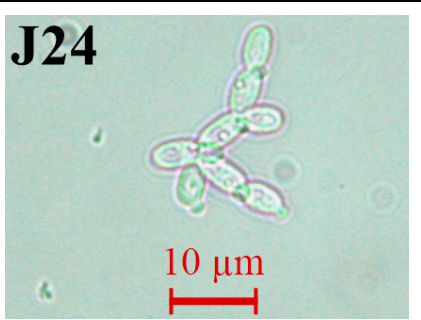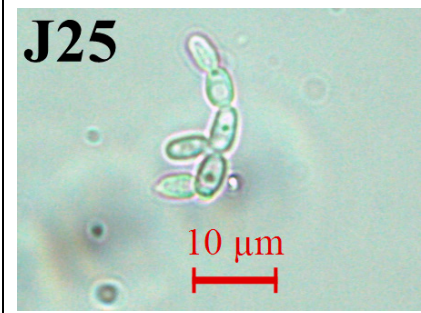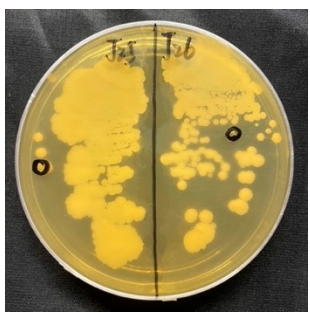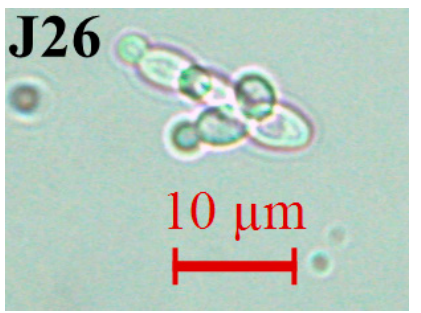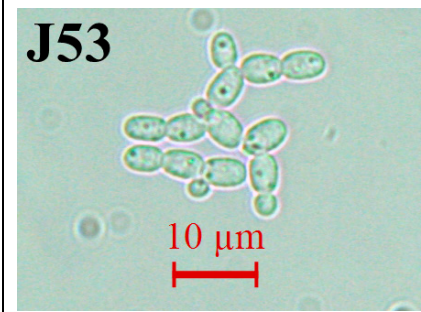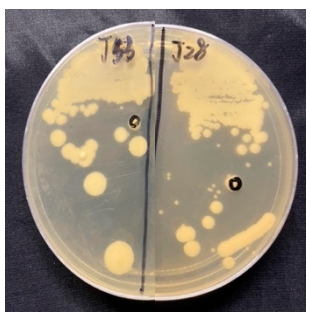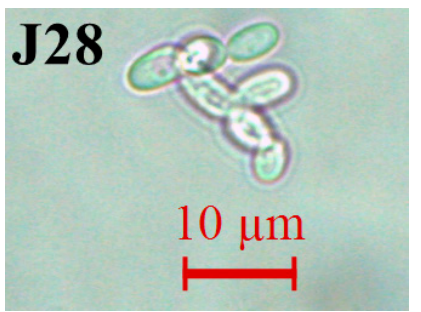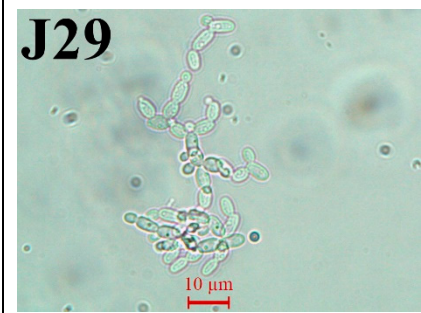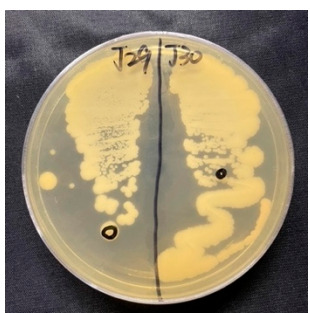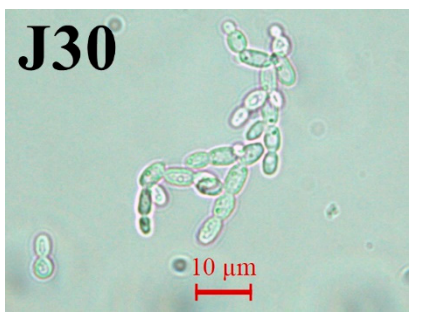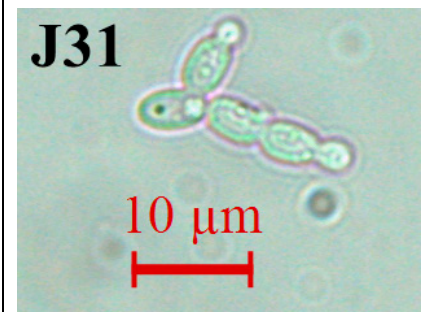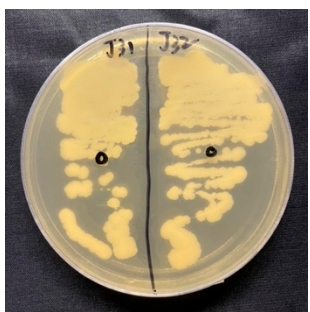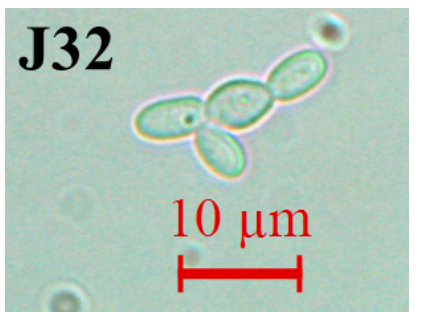



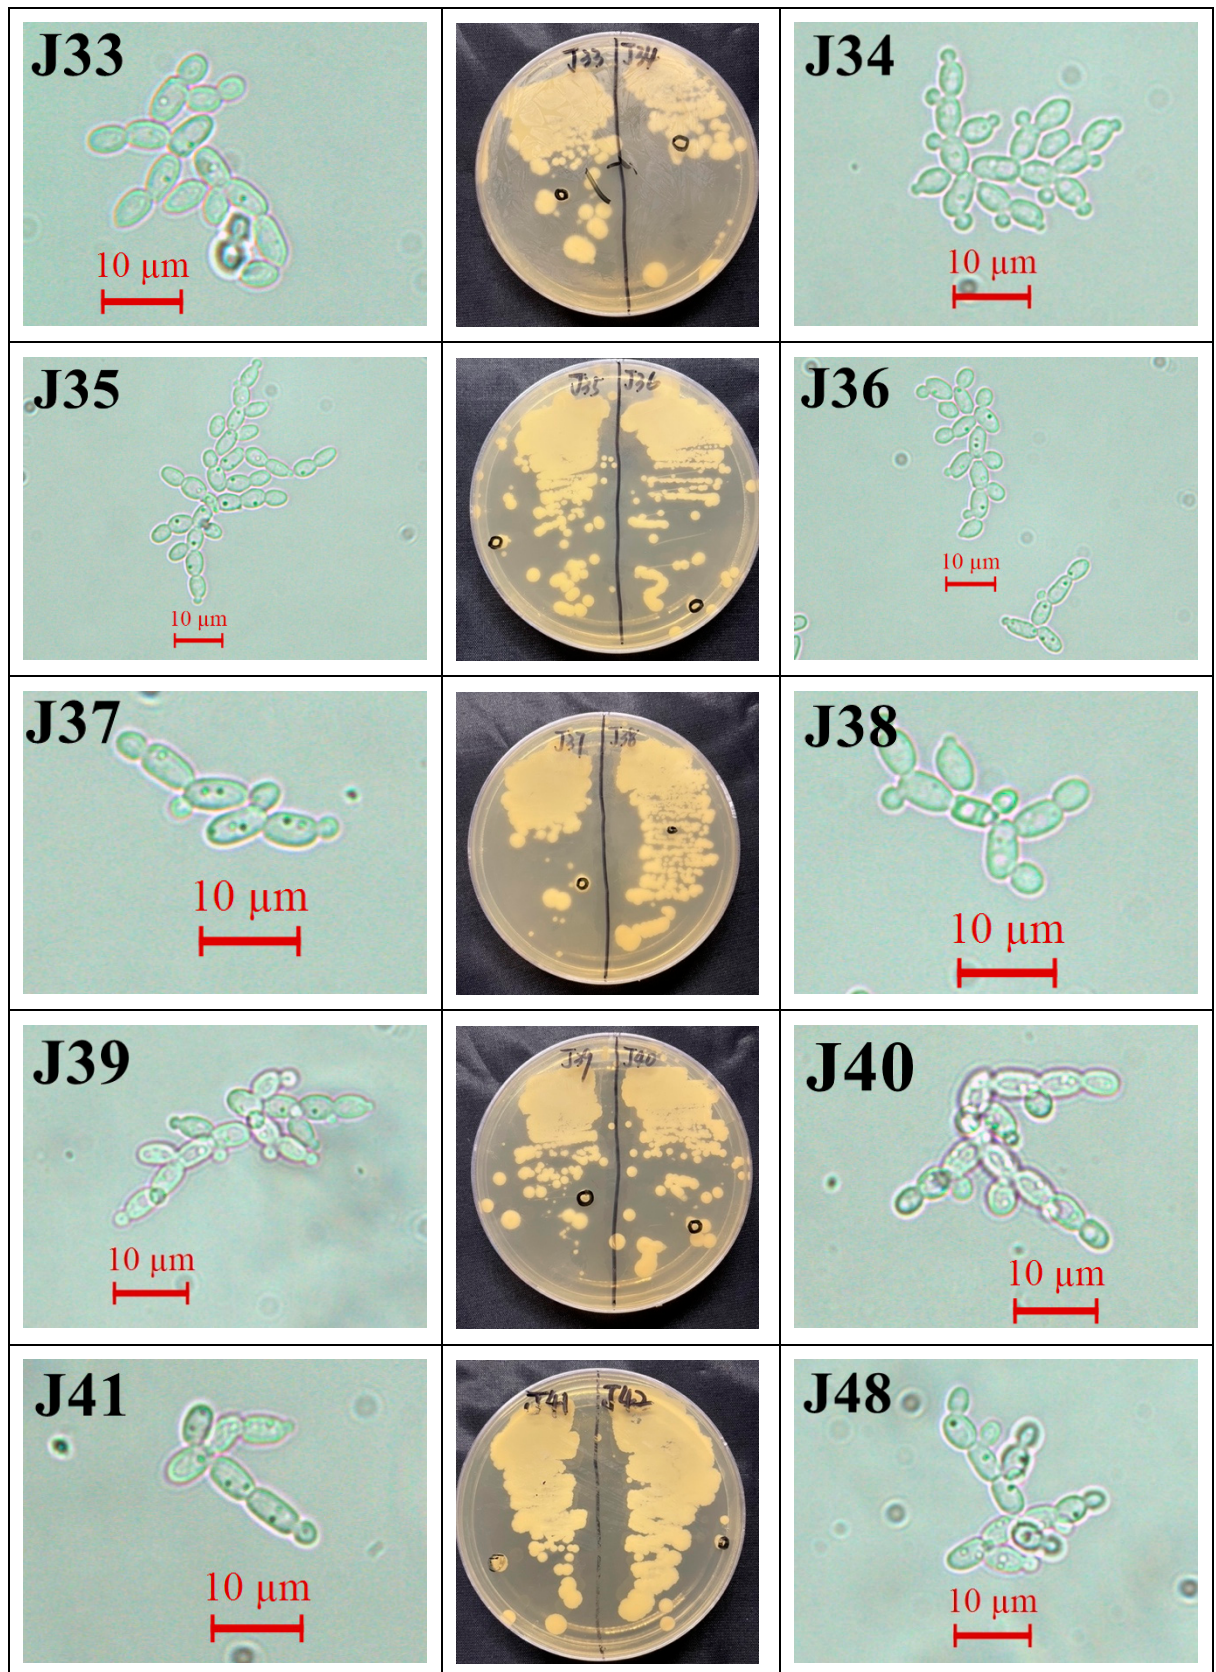



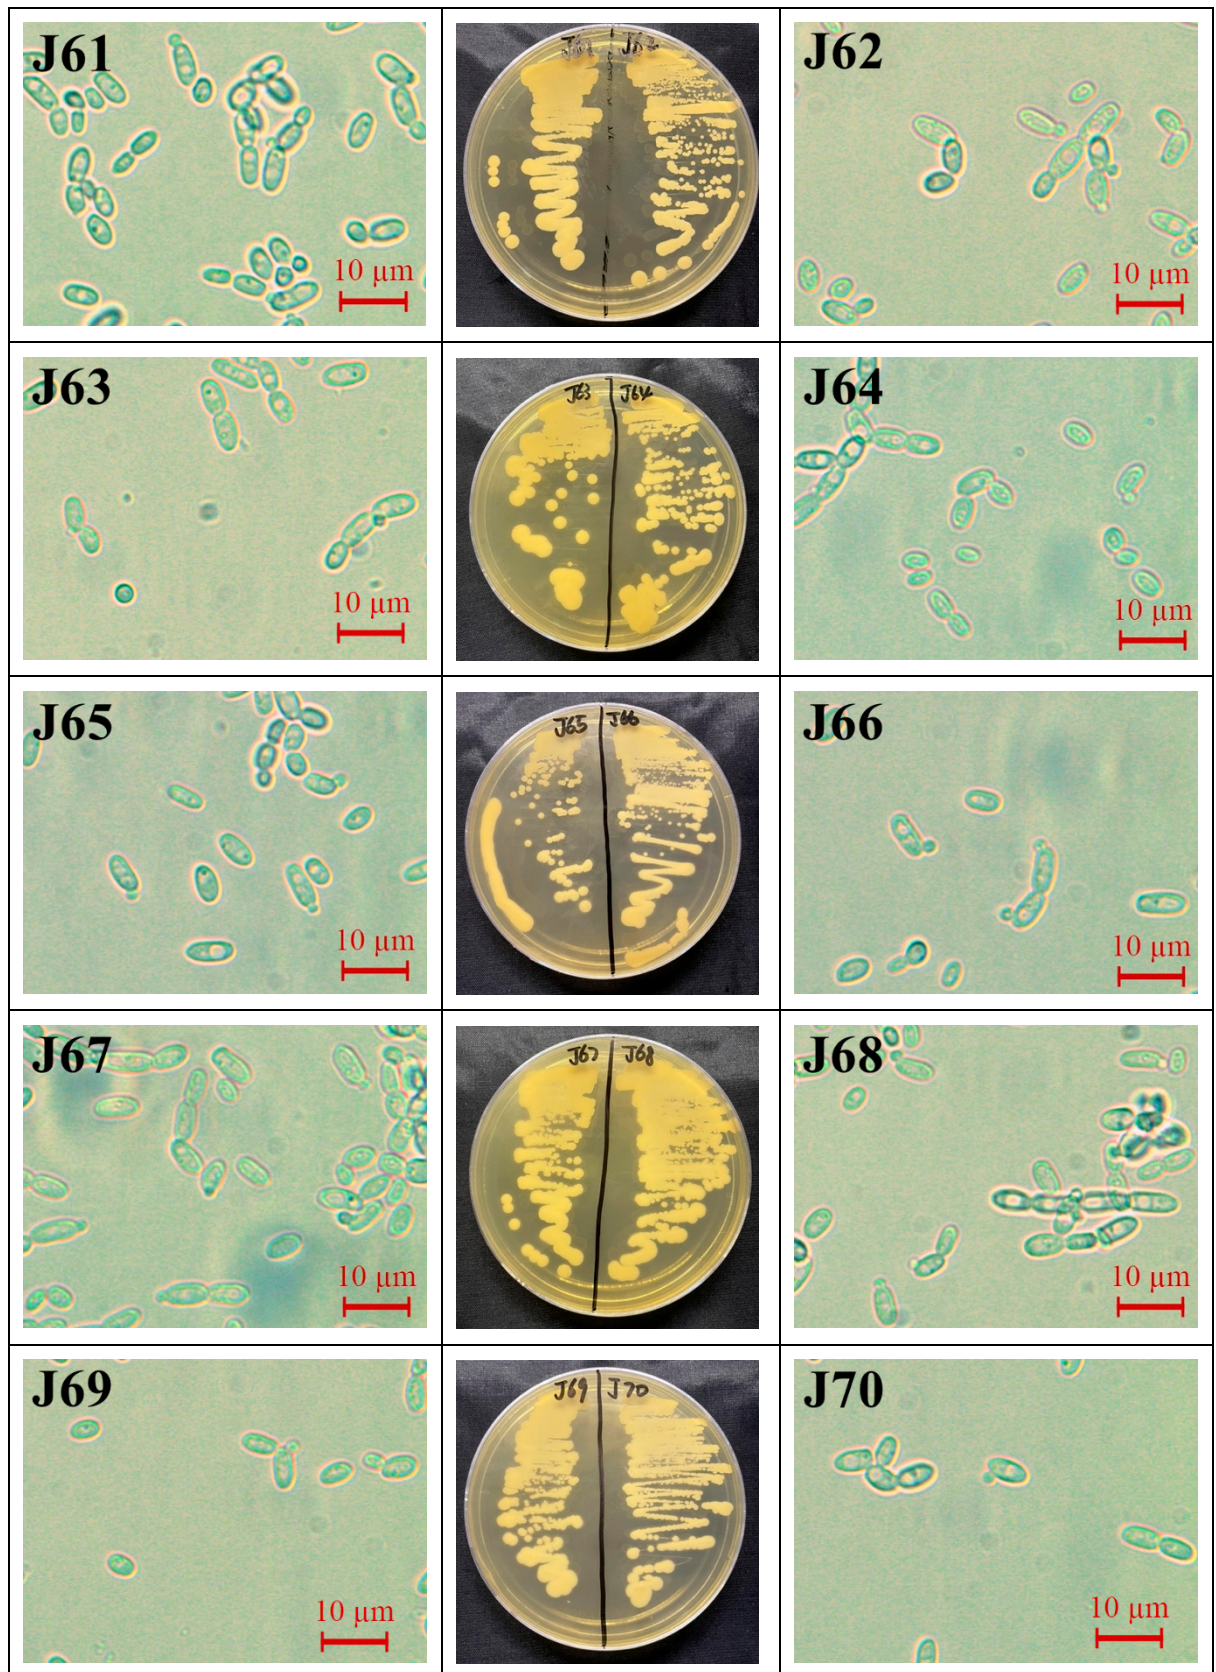



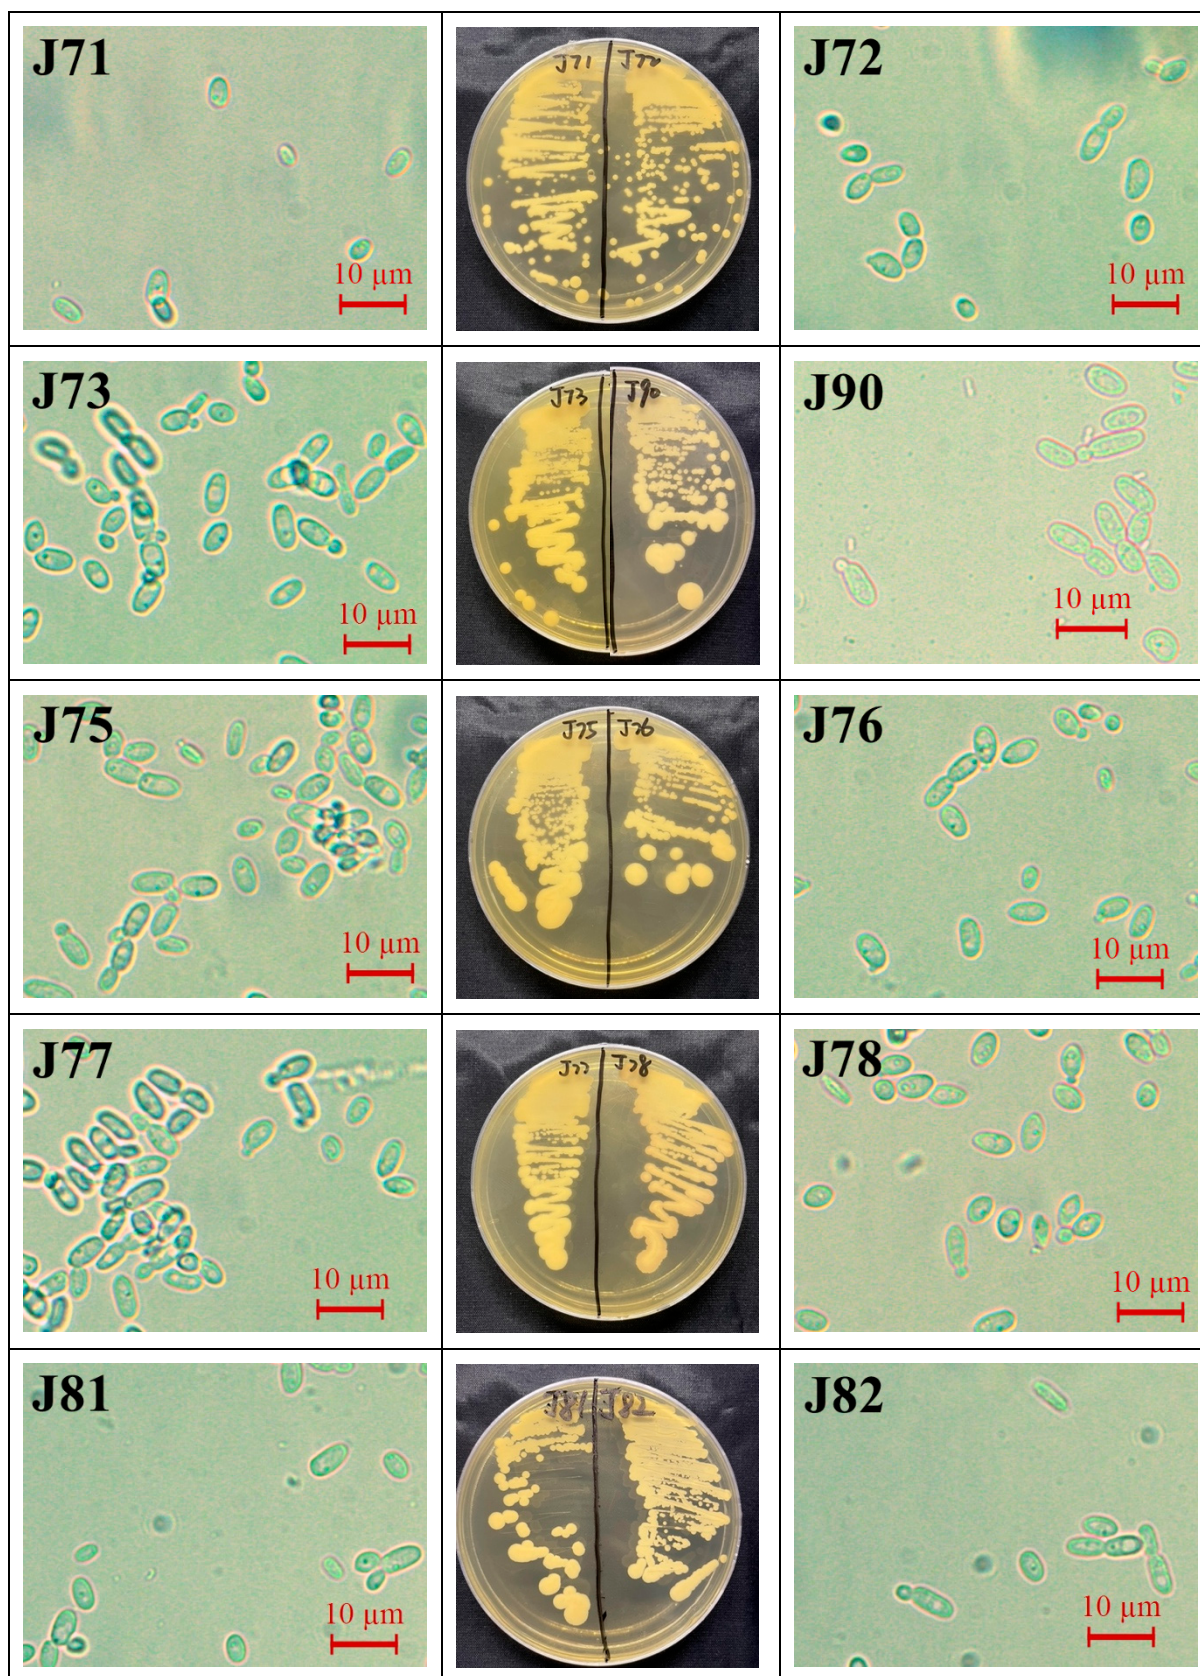



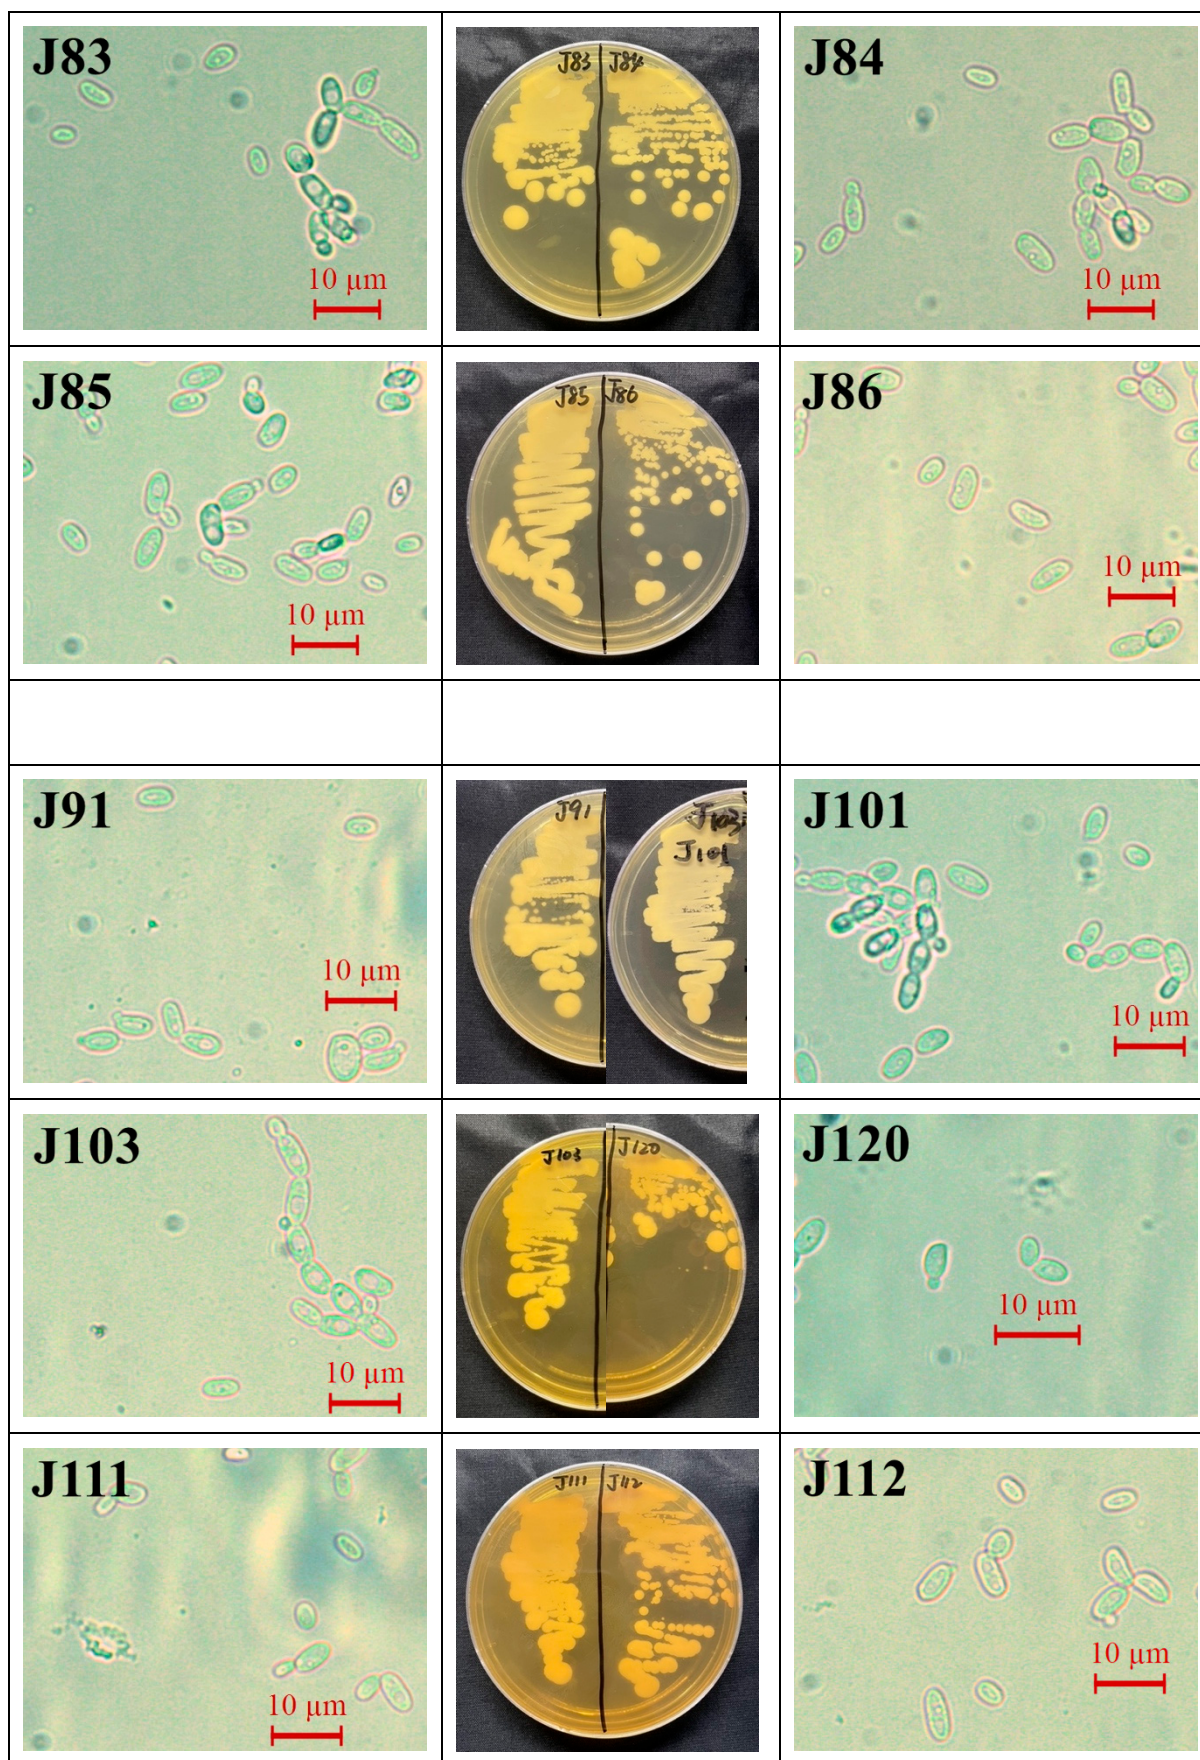



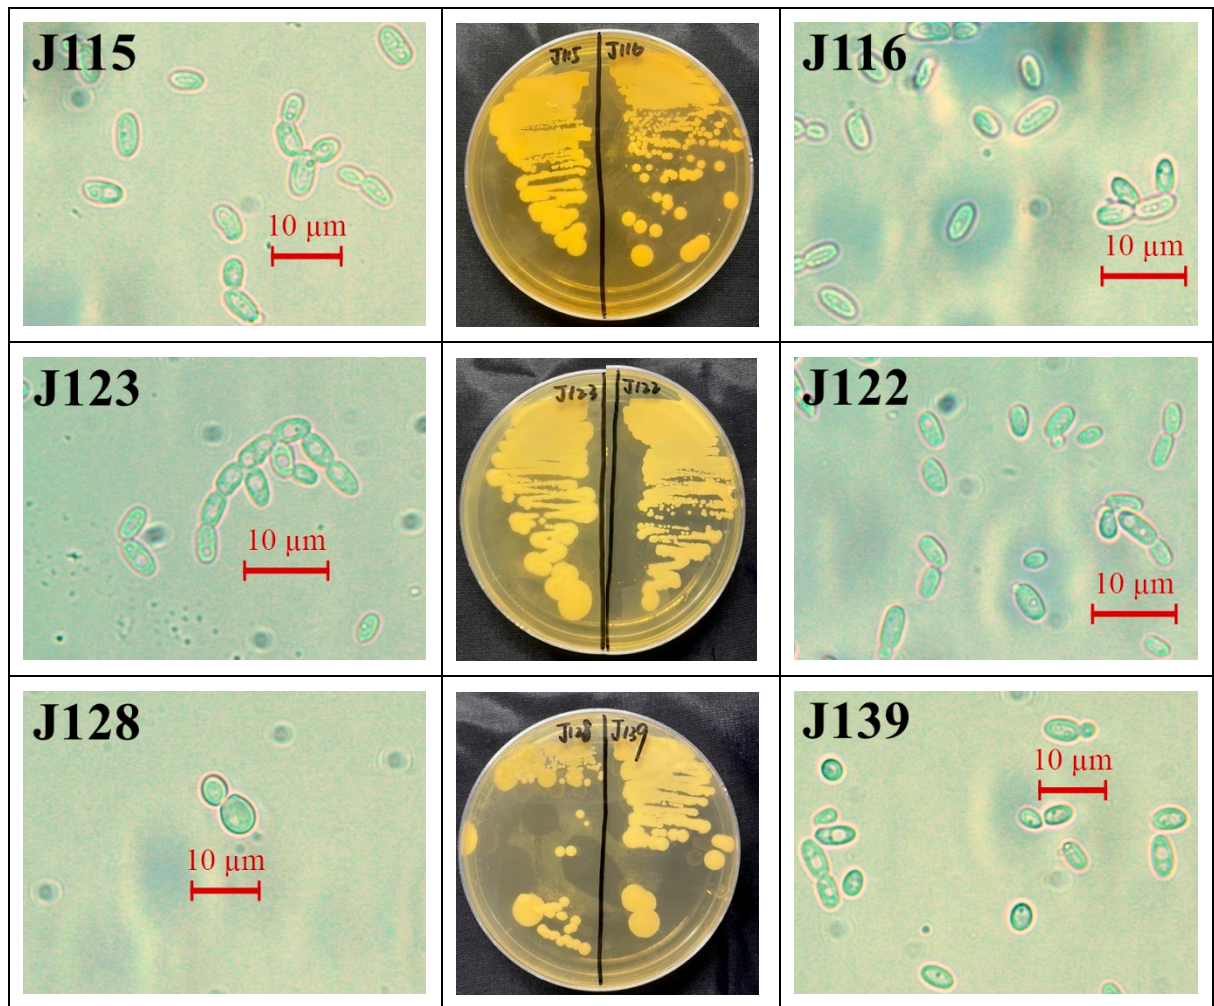

**Figure S2** Results of colony morphological analysis and strain morphological analysis.



**Table S1 The EC concentration of Chinese Baijiu after treated with immobilized J1, J1, immobilized J116, J116 and chitosan at 4 h, 8 h, 12 h and 24 h.**

| System      | Time | Concentration<br>of EC ( $\mu\text{g/L}$ ) | Degradation<br>Rate (%) |
|-------------|------|--------------------------------------------|-------------------------|
| Baijiu      | 0    | $253.03 \pm 9.89$                          | /                       |
|             | 4    | $242.87 \pm 1.14$                          | 4.01                    |
| Immobilized | 8    | $203.90 \pm 2.07$                          | 19.42                   |
| J1          | 12   | $173.10 \pm 1.36$                          | 32.59                   |
|             | 24   | $146.07 \pm 1.67$                          | 42.27                   |
|             | 4    | $218.64 \pm 6.97$                          | 13.59                   |
| Immobilized | 8    | $210.36 \pm 5.12$                          | 14.56                   |
| J116        | 12   | $216.20 \pm 9.27$                          | 16.86                   |
|             | 24   | $182.42 \pm 5.05$                          | 27.91                   |
| J1          | 24   | $200.80 \pm 4.17$                          | 20.64                   |
| J116        | 24   | $205.11 \pm 2.29$                          | 18.93                   |
